1 **Dissecting tumor cell programs through group biology estimation in clinical single-cell**  
2 **transcriptomics**

3 **Authors/Affiliations**

|                             |       |
|-----------------------------|-------|
| Shreya Johri                | 1,2   |
| Kevin Bi                    | 1,2   |
| Breanna M. Titchen          | 1,2,3 |
| Jingxin Fu, PhD.            | 1,2   |
| Jake Conway                 | 1,2,4 |
| Jett P. Crowdis             | 1,2   |
| Natalie I. Volkes, M.D.     | 5     |
| Zenghua Fan, PhD.           | 6     |
| Lawrence Fong, M.D.         | 6     |
| Jihye Park, PhD.            | 1,2   |
| David Liu, M.D.             | 1,2   |
| Meng Xiao He, PhD.          | 1,2   |
| Eliezer M. Van Allen, M.D.* | 1,2   |

4

5 1. Department of Medical Oncology, Dana-Farber Cancer Institute, Boston, MA, USA.

6 2. Broad Institute of Harvard and MIT, Cambridge, MA, USA.

7 3. Harvard Graduate Program in Biological and Biomedical Sciences, Boston, MA, USA.

- 8        4. Harvard Graduate Program in Bioinformatics and Integrative Genomics, Boston, MA,  
9            USA.
- 10       5. Department of Thoracic and Head and Neck Oncology, MD Anderson Cancer Center,  
11            Department of Genomic Medicine, MD Anderson Cancer Center.
- 12       6. Division of Hematology/Oncology, Department of Medicine, University of California, San  
13            Francisco, San Francisco, CA 94143, USA; Parker Institute for Cancer Immunotherapy,  
14            University of California, San Francisco, San Francisco, CA 94143, USA.

15

16    \*corresponding author.

17            Eliezer M. Van Allen

18            Dana-Farber Cancer Institute

19            450 Brookline Ave

20            Boston MA 02215

21            Eliezerm\_vanallen@dfci.harvard.edu

22

## 23 **Abstract**

24 Given the growing number of clinically integrated cancer single-cell transcriptomic studies, robust  
25 differential enrichment methods for gene signatures to dissect tumor cellular states for discovery  
26 and translation are critical. Current analysis strategies neither adequately represent the  
27 hierarchical structure of clinical single-cell transcriptomic datasets nor account for the variability  
28 in the number of recovered cells per sample, leading to results potentially confounded by sample-  
29 driven biology with high false positives instead of accurately representing true differential  
30 enrichment of group-level biology (e.g., treatment responders vs. non-responders). This problem  
31 is especially prominent for single-cell analyses of the tumor compartment, because high intra-  
32 patient similarity (as opposed to inter-patient similarity) results in stricter hierarchical structured  
33 data that confounds enrichment analysis. Furthermore, to identify signatures which are truly  
34 representative of the entire group, there is a need to quantify the robustness of otherwise  
35 statistically significant signatures to sample exclusion. Here, we present a new nonparametric  
36 statistical method, BEANIE, to account for these issues, and demonstrate its utility in two cancer  
37 cohorts stratified by clinical groups to reduce biological hypotheses and guide translational  
38 investigations. Using BEANIE, we show how the consideration of sample-specific versus group  
39 biology greatly decreases the false positive rate and guides identification of robust signatures that  
40 can also be corroborated across different cell type compartments.

41

## 42 **Introduction**

43 Single-cell transcriptomic profiling of patient tumors has enabled high-resolution dissections of  
44 disease progression and treatment response. Building on seminal cellular atlases for specific  
45 cancer types, many studies are increasingly focused on deriving hypotheses by evaluating groups  
46 of patients (e.g., treated vs. untreated, responders vs. non-responders, and early- vs. late-stage)

47 for differences in gene signatures (which may be an experimentally and/or computationally  
48 derived aggregation of related genes or pathways) between the two groups. For this purpose,  
49 methods such as the Mann-Whitney U (MWU) tests and Generalised Linear Models (GLMs) have  
50 been conventionally used in bulk RNA-sequencing (bulk RNA-seq) studies as well as single-cell  
51 transcriptomic analyses;<sup>1-4</sup> however, they may have a number of limitations for the latter  
52 application. First, these methods assume mutual independence of samples, and although this is  
53 not problematic for bulk RNA-seq analyses, cells derived from the same patient in single-cell  
54 analyses do not satisfy this criteria. Second, these methods fall short of representing the  
55 hierarchical structure of tumor single-cell transcriptomic data, as tumor cells tend to exhibit more  
56 intra-patient similarity as compared to inter-patient similarity due to the expression of patient-  
57 specific transcriptional programs driven by DNA-level alterations and epigenetics.<sup>5-8</sup> This  
58 challenge, in turn, may lead to differential enrichment results being skewed by patient-specific  
59 biology, instead of representing genuine group biology. Finally, the number of cells (and hence,  
60 data points) sequenced in these single-cell transcriptomic datasets are typically large compared  
61 to bulk RNA-seq datasets, thereby potentially increasing the power of statistical tests to detect  
62 differences (by rejecting the null hypothesis) between the groups under consideration, which may  
63 not reflect biologically or clinically relevant observations. These challenges exist for other cell  
64 types as well, including the immune and stromal cells, albeit to a lesser extent. As a result of these  
65 significant methodological challenges, single-cell transcriptomic case/control analyses of cancer  
66 samples have thus far often not involved detailed assessments of the tumor compartments, which  
67 has restricted the capability to learn from tumor cellular programs in increasingly complex clinical  
68 contexts.

69

70 To maximize the utility of single-cell transcriptomic analyses between clinically relevant patient  
71 populations and determine how tumor cell programs differ between groups of patients, we



72 developed a nonparametric statistical group biology estimation method (group **B**iology **E**stim**A**tion  
73 **i**n **s**ingle **c**ell, “BEANIE”) inspired from *He et al.*,<sup>9</sup> addressing the above-mentioned issues (Fig.  
74 1, see Methods). This method first estimates the statistical significance (empirical p-value) of the  
75 test signatures through a Monte Carlo approximation of the test signatures’ p-value distribution  
76 (test distribution) and that of the random signatures’ p-value distribution (background distribution),  
77 followed by contextualisation of the former with respect to the latter. It then uses the leave-one-  
78 out cross-validation approach (sample exclusion) to infer robustness of the gene signatures (see  
79 Methods). We used publicly available datasets to demonstrate the utility of this method, and  
80 present suggested guidelines for the design of clinically embedded single-cell transcriptomic  
81 studies in oncology.

82

## 83 **Results**

84 We evaluated single-cell transcriptomic data in two cancer types (melanoma and lung cancer)  
85 that have the following clinical groups for comparison: (i) response to treatment; and (ii) disease  
86 progression.<sup>1,2,10–12</sup> We contextualised their tumor compartments with signatures from the  
87 Molecular Signatures Database (MSigDB),<sup>13,14</sup> including Hallmark (n = 50) and Oncogenic (n =  
88 189) gene sets. We compared results obtained from MWU tests followed by Benjamini-Hochberg  
89 (BH) corrections and GLMs with results obtained from BEANIE, and characterised our approach  
90 relative to these methods (Table 1). Details regarding the implementation and comparisons are  
91 available in the Methods section.

92

### 93 **Group biology analysis of Immune Checkpoint Blockade-naive vs. -exposed melanoma**

94 We first evaluated a melanoma dataset,<sup>1</sup> which included data for both immune checkpoint  
95 blockade (ICB)-naive and ICB-exposed patients, to assess methodologies for comparing clinical  
96 treatment states in tumor cells. All of the ICB-exposed samples were resistant to treatment and  
97 were biopsied from the metastatic sites. We excluded samples having less than 50 tumor cells,  
98 and, in total, there were 1891 tumor cells across 14 patients, with 7 patients per group (Fig. S1,  
99 see Methods). We first assessed the data with Hallmark and Oncogenic gene set signatures from  
100 MSigDb, to characterise treatment-driven biology within the tumor compartment (Fig. 2, Table 1).

101

102 We observed that the MWU test followed by a BH correction and GLMs predicted a large number  
103 of differentially enriched signatures ( $p\text{-value} \leq 0.05$ ), whereas BEANIE was more conservative,  
104 detecting fewer signatures as differentially enriched (Fig. 2b, Table S1). Notably, a majority of the  
105 signatures identified as significant by MWU test and GLMs were labelled as non-significant and  
106 non-robust to sample exclusion by BEANIE.

107

108 Among signatures that were identified as statistically significant and robust to sample exclusion  
109 by BEANIE (see Methods), signatures upregulated in the ICB-naive group include those for genes  
110 upregulated by *STAT5* in response to *IL2* stimulation (HALLMARK\_IL2\_STAT5\_SIGNALING),  
111 genes regulated by NF- $\kappa$ B in response to TNF (HALLMARK\_TNFA\_SIGNALING\_VIA\_NFKB),  
112 and genes defining inflammatory response (HALLMARK\_INFLAMMATORY\_RESPONSE). We  
113 also verified a previously identified T cell exclusion signature<sup>1</sup> upregulated in the ICB-exposed  
114 group as statistically significant and robust to sample exclusion with the BEANIE method. To verify  
115 gene-level differential expression, we used a MWU test and observed differential *IL2* gene  
116 expression for the ICB-naive group in the T cell compartment ( $p\text{-value} = 0.0078$ ), corroborating

117 our finding in the tumor compartment (differential HALLMARK\_IL2\_STAT5\_SIGNALING). We  
118 also identified the top constituent genes (ranked according to log2 fold change and robustness to  
119 sample exclusion, see Methods) for these three signatures, and found that these genes were  
120 differential in the tumor compartment uniformly across samples of a given group (Fig. 2e, Table  
121 S2). Together, these results describe the tumor microenvironment of the ICB-exposed group  
122 (consisting of treatment-resistant patients) as one depleted of T cells, with reduced IL2-STAT5  
123 signaling, TNFA-NFKB signaling, and inflammatory response relative to the ICB-naive group.

124

125 Additionally, we found that the signature for genes upregulated by *IL6* via STAT3  
126 (HALLMARK\_IL6\_JAK\_STAT3\_SIGNALING) was upregulated in the ICB-naive group and  
127 statistically significant and robust to sample exclusion. Using a MWU test, we found differential  
128 *STAT3* expression in the tumor compartment for the ICB-naive group (p-value = 3.28e-36).  
129 Furthermore, we also found a positive correlation between the *STAT3* expression and  
130 HALLMARK\_IL6\_JAK\_STAT3\_SIGNALING signature score in the tumor cells on an individual  
131 cell basis (Fig. 2f). This observation supports the finding that *IL6* could potentially induce  
132 downstream signaling via *STAT3* in the tumor cells of the ICB-naive group.<sup>15,16</sup>

133

134 We further examined the cause for non-robustness of the signatures that were identified as  
135 statistically significant but not robust to sample exclusion by BEANIE (Fig. 2c). We found that the  
136 exclusion of one or more samples led to statistically non-significant results, in contrast to when  
137 the sample was included, by shifting the empirical p-value to greater than 0.05 as a result of an  
138 overlap between the test distribution and the background distribution as shown in Fig. 2d (see  
139 Methods). For example, the signature ONCOGENIC\_RAF\_UP.V1\_UP was not robust to the  
140 exclusion of sample Mel106, and this particular sample was also the cause of non-robustness for

141 21 other signatures. This variability due to sample exclusion was also not explained by any of the  
142 other available clinical variables (e.g., age, sex). Therefore, these signatures were driven by  
143 sample-specific biology, and were consequently not representative of the group-level biology, but  
144 would have otherwise been considered differentially enriched with statistical significance using  
145 either of the conventional MWU test or GLM approaches.

146

147 We next investigated the methodological stability with respect to subsample size (Fig. 2g), and  
148 accordingly repeated BEANIE's workflow using smaller subsample sizes. We found that a smaller  
149 subsampling of cells led to fewer signatures that were identified as statistically significant and  
150 non-robust to sample exclusion, and even fewer that were identified as both statistically significant  
151 and robust to sample exclusion. However, the number of statistically significant and robust  
152 signatures identified by BEANIE reached saturation around the subsample size of 30 cells per  
153 sample, indicating that the subsample size of 60, which had been used for all of the  
154 aforementioned results, could successfully capture all statistically significant signatures from the  
155 test signature sets that were also robust to sample exclusion.

156

157 To assess the ability to detect noise from a true signal, we additionally used a curated set of  
158 immune cell surface marker signatures<sup>17</sup> (including signatures for T cells, NKT cells, NK cells, B  
159 cells, mast cells, and a joint dendritic cell/macrophage signature), that should not be relevant to  
160 tumor cells, to test the performance of the three methods (MWU test with a BH correction, GLMs,  
161 and BEANIE). We observed that a MWU test with a BH correction led to a p-value  $\leq 0.05$  for all  
162 signatures except the B cell signature and GLMs led to a p-value  $\leq 0.05$  for NKT cell, B cell, NK  
163 cell, and the joint dendritic cell/macrophage signatures. By contrast, BEANIE correctly predicted

164 all of the immune cell surface marker signatures as both statistically non-significant and non-  
165 robust to sample exclusion (Table S3).

166

167 Finally, we evaluated BEANIE's performance on the previously reported 18 T cell exclusion  
168 signatures<sup>1</sup> for the tumor cell compartments of a reduced set of patients from the original set used  
169 to derive these (only patient samples with greater than 50 tumor cells were retained, as described  
170 above). We observed that while a MWU test with a BH correction had p-values  $\leq 0.05$  for 18/18  
171 signatures and GLMs had p-values  $\leq 0.05$  for 11/18 signatures, BEANIE had an empirical p-value  
172  $\leq 0.05$  for 17/18 signatures and additionally found 10/18 of them to be robust to sample exclusion.

173

#### 174 **Group biology analysis of distinct clinical states in non-small cell lung carcinoma**

175 In an effort to demonstrate the applicability of BEANIE for a meta-analysis composed of multiple  
176 single-cell transcriptomic datasets, we next analyzed the tumor compartments from four published  
177 lung cancer studies<sup>2,10-12</sup> to evaluate potential differentially enriched signatures between early-  
178 vs. late-stage samples. We selected patient samples which satisfied the following criteria: (i) had  
179 more than 50 tumor cells; (ii) were classified as adenocarcinoma; (iii) were staged as either I, II,  
180 or IV (early-stage = I and II; late-stage = IV); and (iv) had received no prior treatment at the time  
181 of sample collection. Filtering according to these criteria yielded a total of 18251 malignant cells  
182 across 17 patients (11 early-stage, 6 late-stage) (Fig. 3a).

183

184 We sought to characterise the tumor compartment with Hallmark and Oncogenic gene sets from  
185 MSigDb (Fig. 3b, Table 1). Again, a large number of gene sets predicted as differentially enriched  
186 with statistical significance by a MWU test with a BH correction and GLMs were identified as

187 statistically non-significant and non-robust to sample exclusion by BEANIE (Fig. 3c, Table S1).  
188 We found a signature composed of genes important for mitotic spindle assembly  
189 (HALLMARK\_MITOTIC\_SPINDLE) to be statistically significant and robust to sample exclusion  
190 for early-stage lung tumors with BEANIE, consistent with prior studies.<sup>18</sup> Another signature  
191 comprised of genes encoding proteins involved in glycolysis and gluconeogenesis  
192 (HALLMARK\_GLYCOLYSIS) was also found to be statistically significant and robust to sample  
193 exclusion for the early-stage tumors with BEANIE, which is in agreement with a prior study<sup>19</sup>  
194 describing an association between TKI treatment and its effect on decreased activity of glycolysis.  
195 Furthermore, the top constituent genes for both of these signatures were consistently upregulated  
196 across all samples (Fig. S2, Table S2). Thus, BEANIE was able to detect both statistically  
197 significant and robust signatures in the meta-analysis of multiple single-cell transcriptomic  
198 datasets.

199

200 We next sought to evaluate the tumor compartment from two of the lung cancer datasets (Kim et  
201 al.,<sup>10</sup> Maynard et al.<sup>11</sup>) for treatment responses to tyrosine kinase inhibitors (TKIs). We selected  
202 patient samples which satisfied the following criteria: (i) had more than 50 tumor cells; and (ii) the  
203 biopsy was derived from the primary tumor. These filtering criteria led to a total of 7576 malignant  
204 cells across 10 patients (6 TKI-naive, 4 TKI-exposed) (Fig. S3).

205

206 We again used the Hallmark and Oncogenic gene sets to characterise the tumor compartment  
207 (Fig. 4a, 4b, Fig. S3; Table 1, Table S1). Among the signatures that were found to be statistically  
208 significant and robust to sample exclusion with BEANIE, signatures upregulated in the TKI-  
209 exposed group included a signature for genes upregulated in response to *IFNG*  
210 (HALLMARK\_INTERFERON\_GAMMA\_RESPONSE) and a signature for genes upregulated by

211 the overexpression of *WNT1* (ONCOGENIC\_WNT\_UP.V1\_UP). We identified the top constituent  
212 genes of both signatures, and found them to be consistently upregulated across all samples in  
213 the TKI-exposed group (Fig. 4c, Table S2). Interferon gamma response has been described to be  
214 associated with response to TKI treatment in non-small cell lung cancers.<sup>20</sup> Using a MWU test,  
215 we observed that genes encoding the *IFNG* receptors (*IFNGR1*, *IFNGR2*) were differentially  
216 expressed with statistical significance in the tumor cells of the TKI-exposed group (p-value  
217 [*IFNGR1*] = 3.22e-104, p-value [*IFNGR2*] = 1.81e-13, Fig. S3). WNT signaling has also been  
218 extensively studied in the context of cancer development, and increased WNT signaling has been  
219 associated with tumor progression and metastasis in many different cancers.<sup>21</sup> We assessed  
220 potential intratumoral differential gene expression of *WNT1* in the tumor cells and found an  
221 absence of intratumoral *WNT1* expression altogether. We then assessed potential *WNT1*  
222 differential gene expression in specific immune cell compartments (NK cells, macrophages, and  
223 T cells) and found a statistically significant differential expression of *WNT1* for the TKI-exposed  
224 group within the T cell compartment (MWU test, p-value = 8.77e-18), indicating putative cross-  
225 compartment communication between the T cells and tumor cells via *WNT1* signaling. To further  
226 validate this, we used a MWU test to investigate possible differential gene expression of *WNT1*  
227 receptors (*FZD1*, *FZD2*) in the tumor compartment and found both of the receptors to be  
228 upregulated in the TKI-exposed group (p-value [*FZD1*] = 6.35e-21, p-value [*FZD2*] = 1.28e-27).  
229 Of note, patients who were treated with TKI were classified with RECIST as having either PD  
230 (Progressive Disease) or RD (Residual Disease), which raises the hypothesis that these patients  
231 may have developed therapeutic resistance through the WNT/beta-catenin signaling pathway in  
232 alignment with prior preclinical studies.<sup>22</sup>

233

234 In addition, we estimated the stability of BEANIE to subsample size for the test signatures used  
235 (Fig. S3), and found that the number of robust signatures identified persistently increased at the

236 maximum sample size, indicating the possibility that some of the signatures classified as robust  
237 could have been instead classified as non-robust. This may be a result of unbalanced samples  
238 per group being tested or may demonstrate the necessity of additional biological samples for the  
239 clinical context being evaluated.

240

#### 241 **Estimation of the False Positive Rate**

242 In order to estimate the chance of occurrence of incorrectly identified statistically significant and  
243 robust signatures with BEANIE, we calculated the false positive rate (type I error) (see Methods,  
244 Fig. 5) for all three methods (MWU test with a BH correction, GLMs, BEANIE) and clinical contexts  
245 (ICB-naive vs. -exposed melanoma, early- vs. late-stage lung cancer, and TKI-naive vs. -exposed  
246 lung cancer) for the signatures that had been classified by BEANIE as both statistically significant  
247 and robust to sample exclusion.

248

249 We observed that across all datasets, the MWU test with a BH correction had a high average  
250 false positive rate, followed by GLMs which exhibited a moderately high average false positive  
251 rate. By contrast, BEANIE had the lowest average false positive rate, that in some cases also  
252 approached the significance level (alpha) of 5% (Table 2). Individual false positive rates calculated  
253 for all robust and statistically significant signatures can be found in Table S4.

254

255 To evaluate how a smaller number of cells being tested, and thereby reduced statistical power,  
256 would impact the false positive rate for a MWU test with a BH correction and GLMs, we  
257 subsampled cells from each sample being tested to a number equivalent to BEANIE's subsample  
258 size and repeated the type I error estimation. We found that subsampling decreased the false



259 positive rates for both a MWU test with a BH correction and GLMs, but that their false positive  
260 rates were still relatively higher than those calculated with BEANIE, corroborating BEANIE's  
261 aptitude for detecting robust and true signals as compared to the other two methods, and also  
262 reinforcing the need to incorporate robustness estimation into differential enrichment testing.

263

#### 264 **Group biology estimation in immune cells**

265 While this strategy was primarily developed to overcome challenges for differential enrichment  
266 testing specifically within the tumor cell compartment, we also evaluated whether the subsampling  
267 and sample exclusion approach implemented within BEANIE would likewise yield biological  
268 insights in immune cell compartments, as well as to further validate some of the initial hypotheses  
269 from the tumor compartment analyses. As a test case, in continuation of the preliminary evaluation  
270 of the CD8+ T cell compartment as described in the earlier tumor compartment analysis, we more  
271 comprehensively dissected the CD8+ T cell compartment in ICB-naive vs. -exposed melanoma  
272 patients in an isolated context here (Fig. S1).

273

274 We filtered out samples which had fewer than 50 CD8+ T cells, yielding a total of 1292 cells across  
275 11 patients (5 ICB-naive, 6 ICB-exposed). We evaluated the potential statistically significant  
276 differential enrichment and robustness to sample exclusion of various signatures representing a  
277 range of CD8+ T cell subtypes and states from Oliveira et al.<sup>23</sup> between the ICB-naive and -  
278 exposed patient groups. We found that previously reported signatures for early activated CD8+ T  
279 cells (Sade-Feldman<sub>5</sub><sup>24</sup>) and memory precursor effector CD8+ T cells (Joshi\_MPEC,<sup>25</sup> murine-  
280 derived) were statistically significant and robust to sample exclusion, and upregulated for the ICB-  
281 naive patient group. This result substantiates the finding from the tumor compartment of the same  
282 dataset, where we had identified higher IL2-STAT5 signaling, TNF activation, and inflammatory

283 response in the tumor cells from the ICB-naive group as described, which may be a result of  
284 CD8+ T cell activation in the naive condition.

285

286 Therefore, in addition to the demonstrated utility for tumor cell compartments, BEANIE likewise  
287 exhibited capacity for cross-compartment validations of group biology in single-cell non-tumor  
288 populations as well.

289

## 290 **Conclusions**

291 Conventional differential enrichment methods, such as a MWU test with a BH correction and  
292 GLMs, are limited in correctly estimating differential biology in clinical tumor single-cell  
293 transcriptomic datasets in two aspects. First, they have an appreciably high false positive rate,  
294 which can be attributed in part to an increased power of statistical tests (due to high cell numbers)  
295 to detect differences between groups. However, increased power does not necessarily signify a  
296 biologically relevant difference. Consequently, interpretation of these differences in a group  
297 biology context is requisite to correctly distinguish genuine group biological differences from  
298 technical artifacts (such as variation in cell numbers). We also observed that subsampling alone  
299 is insufficient to tackle this problem, and it is important to use a background distribution for  
300 contextualisation. Second, conventional differential enrichment methods do not assess the  
301 robustness of a signature to sample exclusion, and as a consequence, these methods may lead  
302 to results being sample-driven and of uncertain translational importance. This issue is particularly  
303 relevant in clinical contexts, and especially for tumor cell compartments which demonstrate higher  
304 intra-patient similarity than inter-patient similarity, as hypotheses based on group comparison  
305 (about treatment effects, disease progression, etc.) may impact future clinical trials.

306

307 To address the shortcomings of conventional differential enrichment methods, we developed  
308 BEANIE, a nonparametric statistical method for estimating group biology in clinical single-cell  
309 transcriptomic datasets. We demonstrated its application on publicly available datasets from six  
310 clinical single-cell transcriptomic studies, and illustrate its aptitude to detect statistically significant  
311 and robust gene signatures as compared to conventional methods, through its low false positive  
312 rate as compared to its counterparts (MWU test followed by a BH correction and GLMs). We  
313 illustrated its extensive application in the tumor compartment, and its potential utility for the  
314 immune compartment as well. It may likewise be used to identify differential enrichment of gene  
315 signatures in the stromal compartment. Finally, we demonstrated that BEANIE is adept at  
316 distinguishing sample-driven signatures from group-driven signatures, whereas conventional  
317 differential enrichment methods fail to do so. Alternate models for representation of tumor single-  
318 cell data include hierarchical linear models; however, unlike BEANIE, they are parametric and  
319 therefore assume normality and homogeneity of variance for the data.

320

321 Despite its potential to estimate group biology and pinpoint both statistically significant as well as  
322 robust and therefore prospective biologically relevant signatures in single-cell transcriptomic  
323 dissections, BEANIE also possesses a few limitations. First, in spite of its demonstrated value in  
324 single-cell transcriptomic tumor compartment analyses, BEANIE's widespread applicability in the  
325 immune compartment may be limited, in part due to an absence of comprehensive databases  
326 with precise and rigorous signatures representing discrete cell types, states, and pathways. In  
327 fact, the ultimate utility of BEANIE's or any group biology analysis tool's framework is in part  
328 contingent on the quality of the gene signatures being tested, including for the tumor  
329 compartment. Moreover, there also exists scope to further improve the false positive rate within  
330 the BEANIE method. In addition, we do not currently have an understanding of why some patient

331 samples are more prone to contribute to the non-robustness of certain signatures as compared  
332 to other patient samples, and having additional clinical information (e.g., mutational status) could  
333 potentially help delineate some of the biology behind this. Lastly, despite the ability to estimate  
334 group biology and identify statistically significant and robust signatures between patient groups  
335 with BEANIE, current clinical single-cell transcriptomic datasets have an overall small sample  
336 size, which indicates that they are likely not an adequate representation of the broader population  
337 and hence could lead to introduction of false negatives (type II error). Therefore, in general, larger  
338 datasets, such as those generated via consortium efforts, are needed to improve our ability to  
339 draw robust conclusions, and minimise putative false negatives. Broadly, dedicated efforts to  
340 analyze larger clinically integrated single-cell cohorts that reflect the diverse clinical and  
341 therapeutic contexts across cancer types will accelerate our understanding of the cell states that  
342 promote treatment resistance for translational discovery.

343

## 344 **Methods**

### 345 **Data Preprocessing**

#### 346 **Melanoma Dataset**

347 We selected cells which were labelled as malignant (authors made use of inferCNV<sup>28</sup> to identify  
348 malignant cells).

349

#### 350 **Lung Cancer Datasets**

351 Owing to the variability in collected datasets from the four studies (Kim et al.<sup>10</sup>, Maynard et al.<sup>11</sup>,  
352 Qian et al.<sup>12</sup>, and Lambrechts et al.<sup>2</sup>), we carefully assessed the metadata files available. For

353 Lambrechts et al., we reached out to the authors to acquire their Seurat object containing patient  
354 ID and cell ID labelling. We used the following criteria for the selection of cells for analysis: (i)  
355 must be of epithelial origin; (ii) must be identified as malignant by the authors (all studies made  
356 use of inferCNV<sup>28</sup> to identify malignant cells); and (iii) must be isolated from the primary site (i.e.,  
357 lung). We also removed cells from patients that had locally advanced lung cancer (stage III  
358 tumors), as they are more difficult to classify into early- versus late-stage.<sup>26</sup>

359

## 360 **BEANIE's Workflow**

### 361 **Preprocessing and Normalisation**

362 The raw counts matrix is normalised by the library size and converted to counts per million (CPM  
363 normalization) to account for differences in library sizes of different cells. Pre-normalised matrices  
364 may also be used, in which case this step is ignored. Genes with no expression across all cells  
365 are excluded.

366

### 367 **Signature Scoring**

368 For each cell  $c_i$  in the normalised counts matrix, signature scoring is performed for the set of gene  
369 signatures provided as input by the user (test signatures). The default signature scoring method  
370 is adapted from AUCell.<sup>27</sup>

371

372 (i) For each gene  $g_k$ , the cells are ranked by calculating the percentile of each cell across the gene  
373  $g_k$  in terms of normalised expression of the gene, i.e., cells with higher expression values of that  
374 particular gene will have a higher percentile. The ties are randomly broken (i.e. if two cells have

375 the exact same expression of the gene, which is common in single-cell datasets, those cells are  
376 randomly assigned a percentile value).

377 
$$P_{c_i, g_k} = \frac{100 \times n_{c_i, g_k}}{n_c}$$

378 where  $n_{c_i, g_k}$  = ordinal rank of  $c_i$  for expression of  $g_k$  (sorted from smallest to largest),

379  $P_{c_i, g_k}$  = percentile of  $c_i$  for expression of  $g_k$ ,

380 and  $n_c$  is the total number of cells

381

382 (ii) Next, for every cell  $c_i$ , genes are ranked based on their calculated percentile values across  
383 that cell. Genes which have a higher percentile across the cell are given lower ranks. This scoring  
384 system takes into account the importance of each gene in a given cell relative to that gene's  
385 importance in other cells, i.e., genes which have a lower rank are more important for the cell in  
386 question as compared to genes with a higher rank.

387 
$$P'_{g_k, c_i} = \frac{100 \times n'_{g_k, c_i}}{n_g}$$

388 where  $n'_{g_k, c_i}$  = ordinal rank of  $g_k$  for  $P_{c_i, g_k}$  values (sorted from largest to smallest),

389  $P'_{g_k, c_i}$  = percentile of  $g_k$  for  $P_{c_i, g_k}$  values,

390 and  $n_g$  is the total number of genes for the cell  $c_i$

391

392 (iii) For each gene signature  $S_j$ , a recovery curve per cell  $c_i$  is generated by calculating the  
393 enrichment of the top constituent genes ranked from  $S_j$ , followed by a calculation of the Area

394 Under the Curve (AUC), which measures the expression of  $c_i$ 's top constituent genes ranked  
395 from  $S_j$ . The AUC is therefore the score of the cell for  $S_j$ .

396 
$$\text{AUC}_{j,i} = \int f_i(x) dx, f_i(x) = n(S_j \cap R_{x,i})$$

397 where  $S_j$  = set of genes comprising a gene signature

398 and  $R_{x,i}$  = set of top constituent  $x$  genes based on  $P'_{g_k, c_i}$

399

400 Other signature scoring methods available in BEANIE include weighted mean and z-scoring.

401

## 402 **Background Distribution Generation**

403 A background distribution is generated for the biological interpretability of the results as follows:

404 (i) Bins are created based on the gene set size of each signature  $S_j$  (default bin size = 10, tunable

405 parameter). (ii) Random signatures (r\_signatures) ( $R_k$ ,  $k = 1, 2, \dots, n_b$ , where  $n_b$  = total number

406 of bins) for each of the bin sizes are generated such that they are representative of both lowly

407 expressed and highly expressed genes. For this step, the normalised matrix is used and the genes

408 are sorted based on their expression values across all samples. Equal numbers of genes from

409 every 20<sup>th</sup> percentile are then randomly subsampled such that the sum of all genes equals the bin

410 size. This random sampling is repeated multiple times to generate different random signatures

411 ( $R_{kl}$ ,  $l = 1, 2, \dots, n_r$ , where  $n_r$  = the total number of times subsampling is repeated). The rationale

412 for generating the random signatures is that they should not represent any biologically meaningful

413 gene signature, and as a consequence, their differential expression can be used as a null

414 distribution (background distribution) for interpretation of the results in a biological context. (iii)

415 Each cell  $c_i$  is scored for  $R_{kl}$ 's using the aforementioned signature scoring method.

416

## 417 **Folds and Subsampling**

418 To accomplish BEANIE's two-fold aim of having equal sample representation and quantifying  
419 robustness for  $S_j$ s, two statistical techniques, Monte Carlo approximations (subsampling) and  
420 leave-one-out cross-validation (sample exclusion), are coupled. First, the data is divided into folds  
421 ( $f_q$ ,  $q = 1, 2, \dots, n_p$ , where  $n_p =$  number of samples), with each fold  $f_q$  representing the exclusion of  
422 one sample from either group. For each fold  $f_q$ , cells are subsampled such that each sample is  
423 represented by an approximately equal number of cells. This is done by first subsampling an  
424 equal number of cells from all samples, followed by additional subsampling in the sample-  
425 excluded group to compensate for the cells that would have otherwise been subsampled from the  
426 excluded sample. The additional subsampling ensures that the total number of cells subsampled  
427 from the two groups being tested always remains constant regardless of which group the excluded  
428 sample belongs to, which is necessary to ensure that the folds are comparable with each other.  
429 The subsampling is then repeated multiple times to establish adequate representation of each  
430 patient sample.

431

## 432 **Identification of Differentially Enriched Signatures**

433 A multi-step strategy is adopted to identify differentially enriched signatures. First, for each  
434 subsample belonging to the fold  $f_q$ , a MWU test is performed between the two groups for every  
435  $S_j$ . Additionally, for each fold  $f_q$ , a null p-value distribution is generated by a MWU test between  
436 the two groups for every  $R_{kl}$ . The null distribution generated is fold-specific to ensure that the  
437 sample excluded from the fold is also excluded for the generation of the null distribution. The  
438 percentile of the subsample's p-value against the null p-value distribution is then calculated,  
439 hereafter referred to as the empirical p-value. A median empirical p-value is calculated for these



440 subsamples to represent the p-value for a given fold, followed by a median across all folds to  
441 represent the cell's p-value. To quantify the robustness of  $S_j$  to sample exclusion, a ratio  
442 (henceforth referred to as the Fold Rejection Ratio (FRR)) is defined, and calculated for every fold  
443  $f_q$ .

$$444 \quad \text{FRR}_q = \begin{cases} \frac{n(F_q, p \leq 0.05)}{n(F_0, p \leq 0.05)} & \text{if, } n(F_0, p \leq 0.05) \neq 0 \\ 0 & \text{if, } n(F_0, p \leq 0.05) = 0 \end{cases}$$

445 where  $F_q$  = set of subsamples for the fold  $f_q$  which have an empirical p-value  $\leq 0.05$

446 and  $F_0$  = set of subsamples for the fold  $f_0$  (when no sample is excluded) which have an  
447 empirical p-value  $\leq 0.05$

448

449 A FRR value closer to 1 indicates that exclusion of the sample has no effect on the empirical  
450 significance of the gene signature  $S_j$ , and a lower value indicates the opposite. We use a threshold  
451 of 0.9 (hyperparameter) to call signatures as robust or not, i.e., if the FRR for a particular  $S_j$  is  
452 greater than 0.9 for *all* folds, then the gene signature is considered robust to sample exclusion.

453

## 454 **Gene Ranking**

455 For every gene signature  $S_j$ , the genes are then ranked for the robustness of their log2 fold change  
456 between the two groups. This is particularly useful for larger gene sets. For every sample, a mean  
457 gene expression (MGE) is calculated for every gene using the normalised counts. A similar  
458 strategy of subsampling coupled with sample exclusion is used for ranking. The MGE matrix is  
459 then divided into folds, with each fold representing the exclusion of one sample. A log2 fold  
460 change is then calculated for each fold, and the standard deviation, along with the mean across

461 folds, is also calculated. Genes with both outlier MGE values and outlier log<sub>2</sub> fold changes (i.e.,  
462 MGE values and log<sub>2</sub> fold changes more than 1.5 times the interquartile range above the third  
463 quartile or below the first quartile) are classified as non-robust to sample exclusion. The final  
464 ranking of genes is performed based on decreasing log<sub>2</sub> fold change, increasing standard  
465 deviation, and robustness status.

466

### 467 **Mann-Whitney U tests**

468 Mann-Whitney U (MWU) tests followed by Benjamini-Hochberg (BH) correction are performed for  
469 the calculation of p-values. The Python package *scipy* is used for the MWU p-value calculation  
470 and the function *multipletests* from the Python package *statsmodels* is used for the BH correction.

### 471 **Generalised Linear Models**

472 Generalised linear models (GLMs) with a binomial distribution link function are used for calculation  
473 of p-values. The Python package *statsmodels* is used to implement this method. The signature  
474 scores are used as covariates (exog variable), and the group labels (e.g., treatment-naive or -  
475 exposed and early-stage or late-stage) as the response variable to be modelled (exog variable).

### 476 **Calculation of False Positive Rate (Type I Error)**

477 False positive rate (type I error) refers to the probability of detecting a result by chance. To  
478 calculate this, we permute the patient ID and group label in such a way that roughly equal numbers  
479 of samples from the original group labels are placed in both comparison groups. We then repeat  
480 the BEANIE workflow on these permuted datasets for signatures which are classified by BEANIE  
481 as statistically significant and robust to sample exclusion in the original dataset to evaluate the  
482 type I error rates for our predictions. In addition, we also run a MWU test followed by a BH

483 correction and GLMs for these signatures to compare the type I error rates across the three  
484 methods. Finally, to investigate whether Monte Carlo subsampling (with equivalent statistical  
485 power to that of BEANIE's workflow) would affect the false positive rate. For this, we subsample  
486 a random set of cells equal to the number of cells subsampled in the BEANIE workflow and repeat  
487 the MWU test and GLM methods.

488 For the ICB-naive vs. ICB-exposed melanoma dataset (14 samples, 7 in each group) and early-  
489 stage vs. late-stage lung cancer dataset (17 samples, 11 early-stage and 6 late-stage), we ran  
490 1000 simulations per gene signature with the above workflow to estimate the false positive rate.  
491 For the TKI-naive vs. TKI-exposed lung cancer dataset (10 samples, 6 TKI-naive and 4 TKI-  
492 exposed), we ran 100 simulations per gene signature (due to limited combinations of  
493 equidistributed samples per group possible).

494

#### 495 **Data Availability**

496 All datasets used in the study are publicly available. Hallmark and Oncogenic gene sets are  
497 available for download from MSigDb.

498

#### 499 **Code Availability**

500 Code is publicly available as a downloadable Python package from:

501 <https://github.com/sjohri20/beanie>.

502

503 **Acknowledgements**

504 This project was funded by NIH U01 CA233100 (E.M.V.A., L.F.), R01CA227388 (E.M.V.A.),  
505 U2CCA233195 (E.M.V.A.), PCF-Movember Challenge Award (E.M.V.A.)

506

507 **Disclosures**

508 E.M.V.A. has received research support (to institution) from Novartis and BMS. E.M.V.A. serves  
509 as a consultant or on scientific advisory boards of Tango Therapeutics, Genome Medical,  
510 Invitae, Enara Bio, Janssen, Manifold Bio, Monte Rosa. E.M.V.A. has equity in Tango  
511 Therapeutics, Genome Medical, Syapse, Enara Bio, Manifold Bio, Microsoft, Monte Rosa.  
512 E.M.V.A. receives travel reimbursements from Roche/Genentech. E.M.V.A. has filed institutional  
513 patents on chromatin mutations and immunotherapy response, and methods for clinical  
514 interpretation, and has intermittent legal consulting on patents for Foaley & Hoag.

515

516 L.F. has received research support (to institution) from Roche/Genentech, Abbvie, Bavarian  
517 Nordic, Bristol Myers Squibb, Dendreon, Janssen, Merck, and Partner Therapeutics. L.F. has  
518 served on the scientific advisory boards of Actym, Allector, Astra Zeneca, Atreca, Bioalta, Bolt,  
519 Bristol Myer Squibb, Immunogenesis, Merck, Merck KGA, Nutcracker, RAPT, Scribe, Senti,  
520 Soteria, TeneoBio, and Roche/Genentech.

521

522 M.X.H. has been a consultant to Amplify Medicines, Ikena Oncology, and Janssen. He is also  
523 currently an employee of Genentech/Roche.

524

525 J.C. has been a consultant to Tango Therapeutics. He is also currently an employee of PathAI.

526

527 N.I.V. serves on advisory boards of Sanofi and Oncocyte.

528

## 529 **Author Contributions**

530 M.X.H. and E.M.V.A. conceived the original idea. S.J. developed the idea further, designed  
531 experiments, performed the analyses, and developed the Python package for the presented  
532 method. K.B., B.M.T., J.F. and M.X.H. helped in development of the method from a single-cell  
533 perspective. M.X.H., J.C. and D.L. provided input from a statistical perspective. J.P.C. provided  
534 input for the development of visualisation modules in the package. N.I.V. and D.L. helped in  
535 clinical interpretation of the results. Z.F., J.P., L.F., D.L., and E.M.V.A. contributed to the overall  
536 analyses. S.J., B.M.T., K.B., and E.M.V.A. wrote the manuscript. All authors reviewed and  
537 approved the final manuscript.

538

## 539 **Competing Interests statement**

540 The authors declare no competing interests.

541

## 542 **References**

- 543 1. Jerby-Arnon, L. *et al.* A Cancer Cell Program Promotes T Cell Exclusion and Resistance to  
544 Checkpoint Blockade. *Cell* **175**, 984–997.e24 (2018).

- 545 2. Lambrechts, D. *et al.* Phenotype molding of stromal cells in the lung tumor  
546 microenvironment. *Nat. Med.* **24**, 1277–1289 (2018).
- 547 3. Liao, M. *et al.* Single-cell landscape of bronchoalveolar immune cells in patients with  
548 COVID-19. *Nat. Med.* **26**, 842–844 (2020).
- 549 4. Habib, N. *et al.* Disease-associated astrocytes in Alzheimer’s disease and aging. *Nat.*  
550 *Neurosci.* **23**, 701–706 (2020).
- 551 5. Korsunsky, I. *et al.* Fast, sensitive and accurate integration of single-cell data with  
552 Harmony. *Nat. Methods* **16**, 1289–1296 (2019).
- 553 6. Lütge, A. *et al.* CellMixS: quantifying and visualizing batch effects in single-cell RNA-seq  
554 data. *Life Sci Alliance* **4**, (2021).
- 555 7. Chen, W. *et al.* A multicenter study benchmarking single-cell RNA sequencing technologies  
556 using reference samples. *Nat. Biotechnol.* **39**, 1103–1114 (2020).
- 557 8. Richards, L. M. *et al.* A comparison of data integration methods for single-cell RNA  
558 sequencing of cancer samples. *bioRxiv* 2021.08.04.453579 (2021)  
559 doi:10.1101/2021.08.04.453579.
- 560 9. He, M. X. *et al.* Transcriptional mediators of treatment resistance in lethal prostate cancer.  
561 *Nat. Med.* **27**, 426–433 (2021).
- 562 10. Kim, N. *et al.* Single-cell RNA sequencing demonstrates the molecular and cellular  
563 reprogramming of metastatic lung adenocarcinoma. *Nat. Commun.* **11**, 1–15 (2020).
- 564 11. Maynard, A. *et al.* Therapy-Induced Evolution of Human Lung Cancer Revealed by Single-  
565 Cell RNA Sequencing. *Cell* **182**, 1232–1251.e22 (2020).
- 566 12. Qian, J. *et al.* A pan-cancer blueprint of the heterogeneous tumor microenvironment

- 567 revealed by single-cell profiling. *Cell Res.* **30**, 745–762 (2020).
- 568 13. Subramanian, A. *et al.* Gene set enrichment analysis: a knowledge-based approach for  
569 interpreting genome-wide expression profiles. *Proc. Natl. Acad. Sci. U. S. A.* **102**, 15545–  
570 15550 (2005).
- 571 14. Liberzon, A. *et al.* The Molecular Signatures Database (MSigDB) hallmark gene set  
572 collection. *Cell Syst* **1**, 417–425 (2015).
- 573 15. Sansone, P. & Bromberg, J. Targeting the interleukin-6/Jak/stat pathway in human  
574 malignancies. *J. Clin. Oncol.* **30**, 1005–1014 (2012).
- 575 16. Block, K. M., Hanke, N. T., Maine, E. A. & Baker, A. F. IL-6 stimulates STAT3 and Pim-1  
576 kinase in pancreatic cancer cell lines. *Pancreas* **41**, 773–781 (2012).
- 577 17. Zhu, Y., Yao, S. & Chen, L. Cell surface signaling molecules in the control of immune  
578 responses: a tide model. *Immunity* **34**, 466–478 (2011).
- 579 18. Curtis, N. L., Ruda, G. F., Brennan, P. & Bolanos-Garcia, V. M. Deregulation of  
580 Chromosome Segregation and Cancer. *Annu. Rev. Cancer Biol.* **4**, 257–278 (2020).
- 581 19. Poliaková, M., Aebbersold, D. M., Zimmer, Y. & Medová, M. The relevance of tyrosine  
582 kinase inhibitors for global metabolic pathways in cancer. *Mol. Cancer* **17**, 27 (2018).
- 583 20. Gurule, N. J. *et al.* A tyrosine kinase inhibitor-induced interferon response positively  
584 associates with clinical response in EGFR-mutant lung cancer. *npj Precision Oncology* **5**,  
585 1–11 (2021).
- 586 21. Zhan, T., Rindtorff, N. & Boutros, M. Wnt signaling in cancer. *Oncogene* **36**, 1461–1473  
587 (2016).
- 588 22. Song, Z., Wang, H. & Zhang, S. Negative regulators of Wnt signaling in non-small cell lung

- 589 cancer: Theoretical basis and therapeutic potency. *Biomed. Pharmacother.* **118**, 109336  
590 (2019).
- 591 23. Oliveira, G. *et al.* Phenotype, specificity and avidity of antitumour CD8+ T cells in  
592 melanoma. *Nature* **596**, 119–125 (2021).
- 593 24. Sade-Feldman, M. *et al.* Defining T Cell States Associated with Response to Checkpoint  
594 Immunotherapy in Melanoma. *Cell* **175**, 998–1013.e20 (2018).
- 595 25. Joshi, N. S. *et al.* Inflammation Directs Memory Precursor and Short-Lived Effector CD8+ T  
596 Cell Fates via the Graded Expression of T-bet Transcription Factor. *Immunity* **27**, 281–295  
597 (2007).
- 598 26. Goldstraw, P. *et al.* The IASLC Lung Cancer Staging Project: Proposals for Revision of the  
599 TNM Stage Groupings in the Forthcoming (Eighth) Edition of the TNM Classification for  
600 Lung Cancer. *J. Thorac. Oncol.* **11**, 39–51 (2016).
- 601 27. Aibar, S. *et al.* SCENIC: single-cell regulatory network inference and clustering. *Nat.*  
602 *Methods* **14**, 1083–1086 (2017).
- 603 28. inferCNV of the Trinity CTAT Project. <https://github.com/broadinstitute/inferCNV>

604

605



## 606 **Figure Legends**

### 607 **Main Figures**

#### 608 Figure 1. Overview of the BEANIE method.

609 A. Overall workflow: A counts matrix, sample IDs, group IDs, and a list of signatures for which  
610 differential enrichment will be tested (test signatures,  $t\_signatures$ ) are provided as user input.  
611 Based on the gene set size, test signatures are first divided into bins. For each bin size, a list of  
612 random signatures ( $r\_signatures$ ) of the same gene set size is generated, to be later used for p-  
613 value calculation and biological interpretation. Signature scoring per cell is performed for both  
614 random signatures and test signatures, followed by differential enrichment testing.

615 B. Differential enrichment testing workflow: The differential enrichment testing algorithm is  
616 based on a combination of Monte Carlo approximation of empirical p-value through  
617 subsampling, and leave-one-out cross validation through sample exclusion. The data is first  
618 divided into folds, where each fold  $f_q$  represents the exclusion of a sample from either of the  
619 comparison groups. This is followed by the subsampling step, where an equal number of cells  
620 are subsampled from every sample to ensure equal patient representation. Next, a Mann-  
621 Whitney U test is performed per subsample for all folds, for both the test signatures and the  
622 background distribution (generated from the random signatures). The test signatures are then  
623 matched to their corresponding background distribution based on bin size, and an empirical p-  
624 value (percentile of the test distribution's median with respect to the background distribution) is  
625 calculated per test signature for every fold  $f_q$ . Additionally, a Fold Rejection Ratio (FRR) (see  
626 Methods) is calculated per test signature for every fold, and is used to determine the overall  
627 robustness of the test signature to sample exclusion.

628

629 Figure 2. Group biology analysis of the tumor compartment from ICB-naive vs. ICB-exposed  
630 melanoma patient samples.

631 A. Bar plot displaying the  $\log(\text{empirical p-value})$  for all of the signatures identified as statistically  
632 significant (empirical p-value  $\leq 0.05$ ), along with their robustness status. A '\*\*\*\*' above a bar  
633 indicates that the empirical p-value for that test signature was below the minimum empirical p-  
634 value measured.

635 B. Venn diagram quantifying the intersection of signatures identified as differentially enriched with  
636 statistical significance by the three methods (MWU test with a BH correction, GLMs, and BEANIE).

637 C. Plot depicting the signatures identified as statistically significant but non-robust to sample  
638 exclusion by BEANIE, the distribution of their Fold Rejection Ratios (FRRs), and the sample IDs  
639 having FRRs less than the threshold used to determine robustness, along with a horizontal bar  
640 plot of the number of statistically significant but non-robust signatures (dropout signatures) per  
641 sample.

642 D. Histogram illustrating the sample exclusion procedure implemented within BEANIE shifting the  
643 test distribution to the right such that it overlaps with the background distribution, leading to the  
644 fold's empirical p-value being greater than 0.05.

645 E. Heatmap revealing the differential top constituent genes (ranked according to  $\log_2$  fold change  
646 and robustness) from three of the statistically significant and robust signatures identified by  
647 BEANIE across all patients from the ICB-naive group.

648 F. Joint scatter and density plot demonstrating a positive correlation between the  
649 HALLMARK\_IL6\_JAK\_STAT3\_SIGNALING signature score and STAT3 gene expression in  
650 individual cells.

651 G. Plot illustrating BEANIE's stability to subsample size for the test signatures used. The curve  
652 plateaued as the number of statistically significant test signatures, irrespective of robustness  
653 status, reached saturation as the subsample size approached 60 (the max subsample size  
654 possible within the constraints of this dataset [see Methods]), whereas the curve plateaued  
655 around the subsample size of 30 as the number of signatures identified as both statistically  
656 significant and robust reached saturation.

657

658 Figure 3. Group biology analysis for early- vs. late-stage non-small cell lung cancer.

659 A. Overview of the integrated dataset from four studies and a bar plot depicting the number of  
660 tumor cells per patient sample.

661 B. Bar plot displaying the log(empirical p-value) for all of the signatures identified as statistically  
662 significant (empirical p-value  $\leq 0.05$ ), along with their robustness status.

663 C. Venn diagram quantifying the intersection of signatures identified as differentially enriched with  
664 statistical significance by the three methods (MWU test with a BH correction, GLMs, and BEANIE).

665 D. Plot depicting the signatures identified as statistically significant but non-robust to sample  
666 exclusion by BEANIE, the distribution of their FRRs, and the patient IDs having FRRs less than  
667 the threshold used to determine robustness, along with a horizontal bar plot of the number of  
668 statistically significant but non-robust signatures (dropout signatures) per sample.

669

670 Figure 4. Group biology analysis for TKI-naive vs. TKI-exposed non-small cell lung cancer.

671 A. Venn diagram quantifying the intersection of signatures identified as differentially enriched with  
672 statistical significance by the three methods (MWU test with a BH correction, GLMs, and BEANIE).

673 B. Bar plot displaying the  $\log(\text{empirical p-value})$  for all of the signatures identified as statistically  
674 significant (empirical p-value  $\leq 0.05$ ) along with their robustness status. A ‘\*\*\*’ above a bar  
675 indicates that the empirical p-value for that test signature was below the minimum empirical p-  
676 value measured.

677 C. Heatmap showing the differential top constituent genes (ranked according to  $\log_2$  fold change  
678 and robustness) from the HALLMARK\_INTERFERON\_GAMMA\_RESPONSE and  
679 ONCOGENIC\_WNT\_UP.V1\_UP signatures across all samples from the TKI-exposed group.

680

681 Figure 5. False positive rate (type I error) for the three methods: BEANIE, GLMs, and a MWU  
682 test followed by a BH correction.

683 The false positive rate for signatures (from Hallmark and Oncogenic gene sets) which were  
684 classified as statistically significant and robust to sample exclusion by BEANIE for:

685 A. ICB-naive vs. ICB-exposed melanoma dataset,

686 B. Early-stage vs. Late-stage lung cancer dataset, and

687 C. TKI-naive vs. TKI-exposed lung cancer dataset

688 The dashed pink line denotes the 5% error mark.

689

## 690 **Supplementary figures**

691 Figure S1. Distribution of cells from ICB-naive vs. ICB-exposed melanoma patient samples.

692 A. Distribution of tumor cells.

693 B. Distribution of CD8+ T cells.

694

695 Figure S2. Heatmap displaying the differential top constituent genes (ranked according to log<sub>2</sub>  
696 fold change and robustness) from the HALLMARK\_MITOTIC\_SPINDLE and  
697 HALLMARK\_GLYCOLYSIS gene signatures in the early- vs. late-stage lung cancer dataset.

698

699 Figure S3. Extended group biology analysis of the tumor compartment from TKI-naive vs. TKI-  
700 exposed lung cancer patient samples.

701 A. Distribution of tumor cells in the TKI-naive vs. -exposed lung cancer samples.

702 B. Boxplot illustrating statistically significant differential expression of the genes IFNGR1 and  
703 IFNGR2 between TKI-naive vs. TKI-exposed samples.

704 C. Line plot illustrating BEANIE's stability to subsample size for TKI-naive vs. -exposed lung  
705 cancer samples. The curve plateaued as the number of signatures identified as statistically  
706 significant, irrespective of robustness status, reached saturation as the subsample size  
707 approached 100.

708 D. Plot depicting the test signatures identified as statistically significant but non-robust to sample  
709 exclusion by BEANIE for TKI-naive vs. TKI-exposed samples, the distribution of their FRRs, and  
710 the patient IDs having FRRs less than threshold used to determine robustness, along with a  
711 horizontal bar plot of the number of statistically significant but non-robust signatures (dropout  
712 signatures) per sample.

713

714 **Supplementary Tables**

715 Table S1: Hallmark and Oncogenic gene set results for MWU test + BH correction, GLMs, and  
716 BEANIE, for all datasets (ICB-naive vs. -exposed melanoma, early- vs. late-stage lung cancer,  
717 and TKI-naive vs. -exposed lung cancer).

718

719 Table S2: Top genes for Hallmark and Oncogenic gene sets for all datasets (ICB-naive vs. -  
720 exposed melanoma, early- vs. late-stage lung cancer, and TKI-naive vs. -exposed lung cancer).

721

722 Table S3: Noise estimation p-values for the three methods (MWU test with a BH correction, GLMs,  
723 and BEANIE).

724

725 Table S4: False positive rate (in percentage) for statistically significant and robust signatures  
726 identified by BEANIE for the Hallmark and Oncogenic gene sets for all datasets (ICB-naive vs. -  
727 exposed melanoma, early- vs. late-stage lung cancer, and TKI-naive vs. -exposed lung cancer).

728

**Figure 1.**  
A.

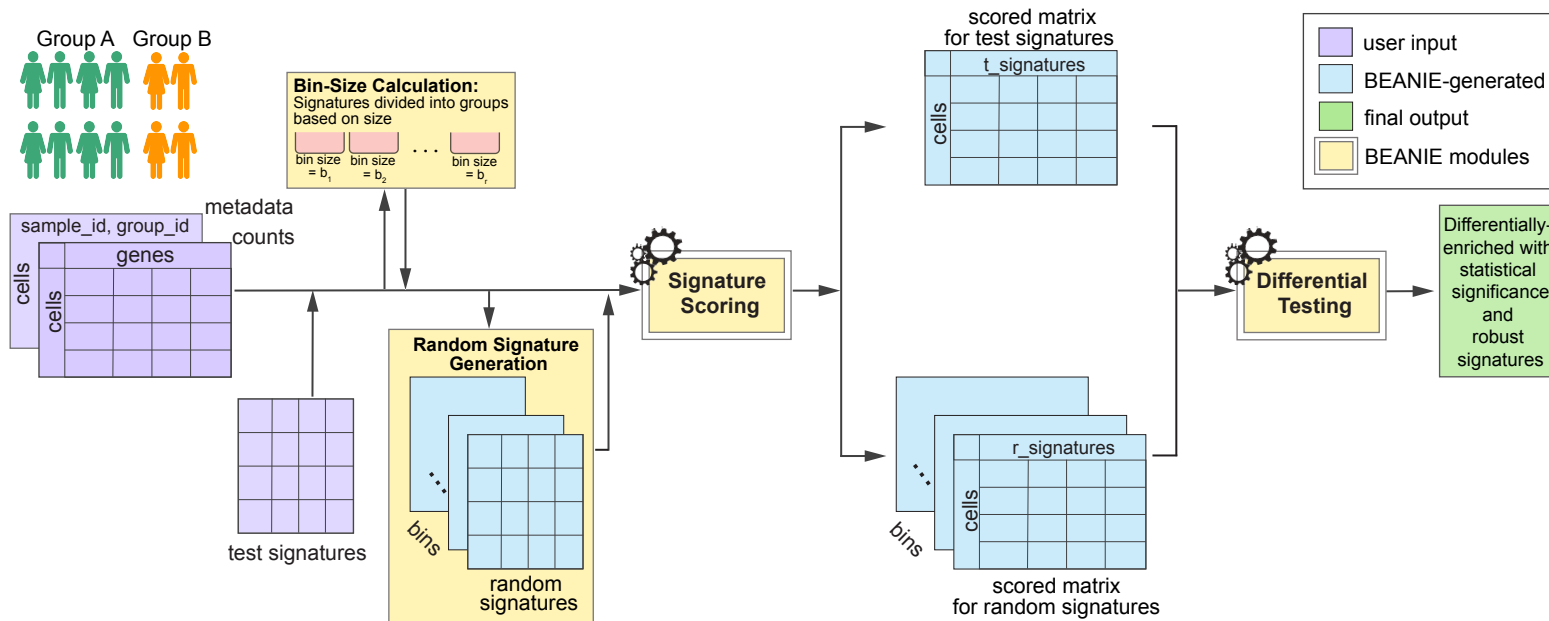

**B.**

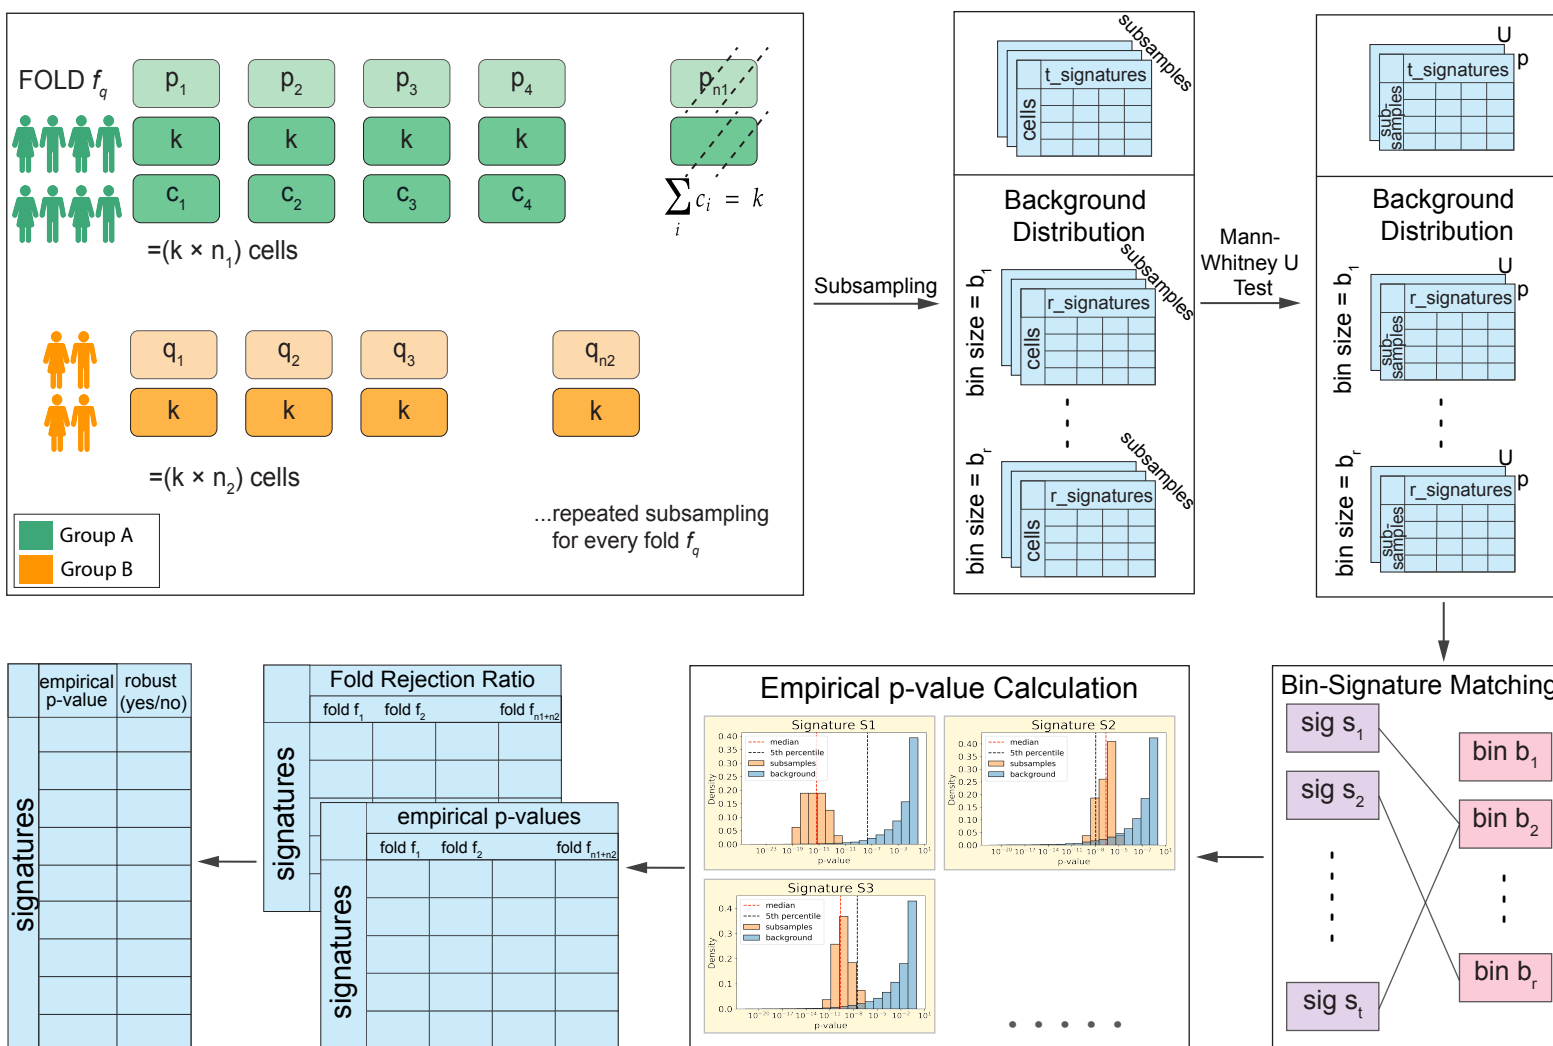

# Figure 2.

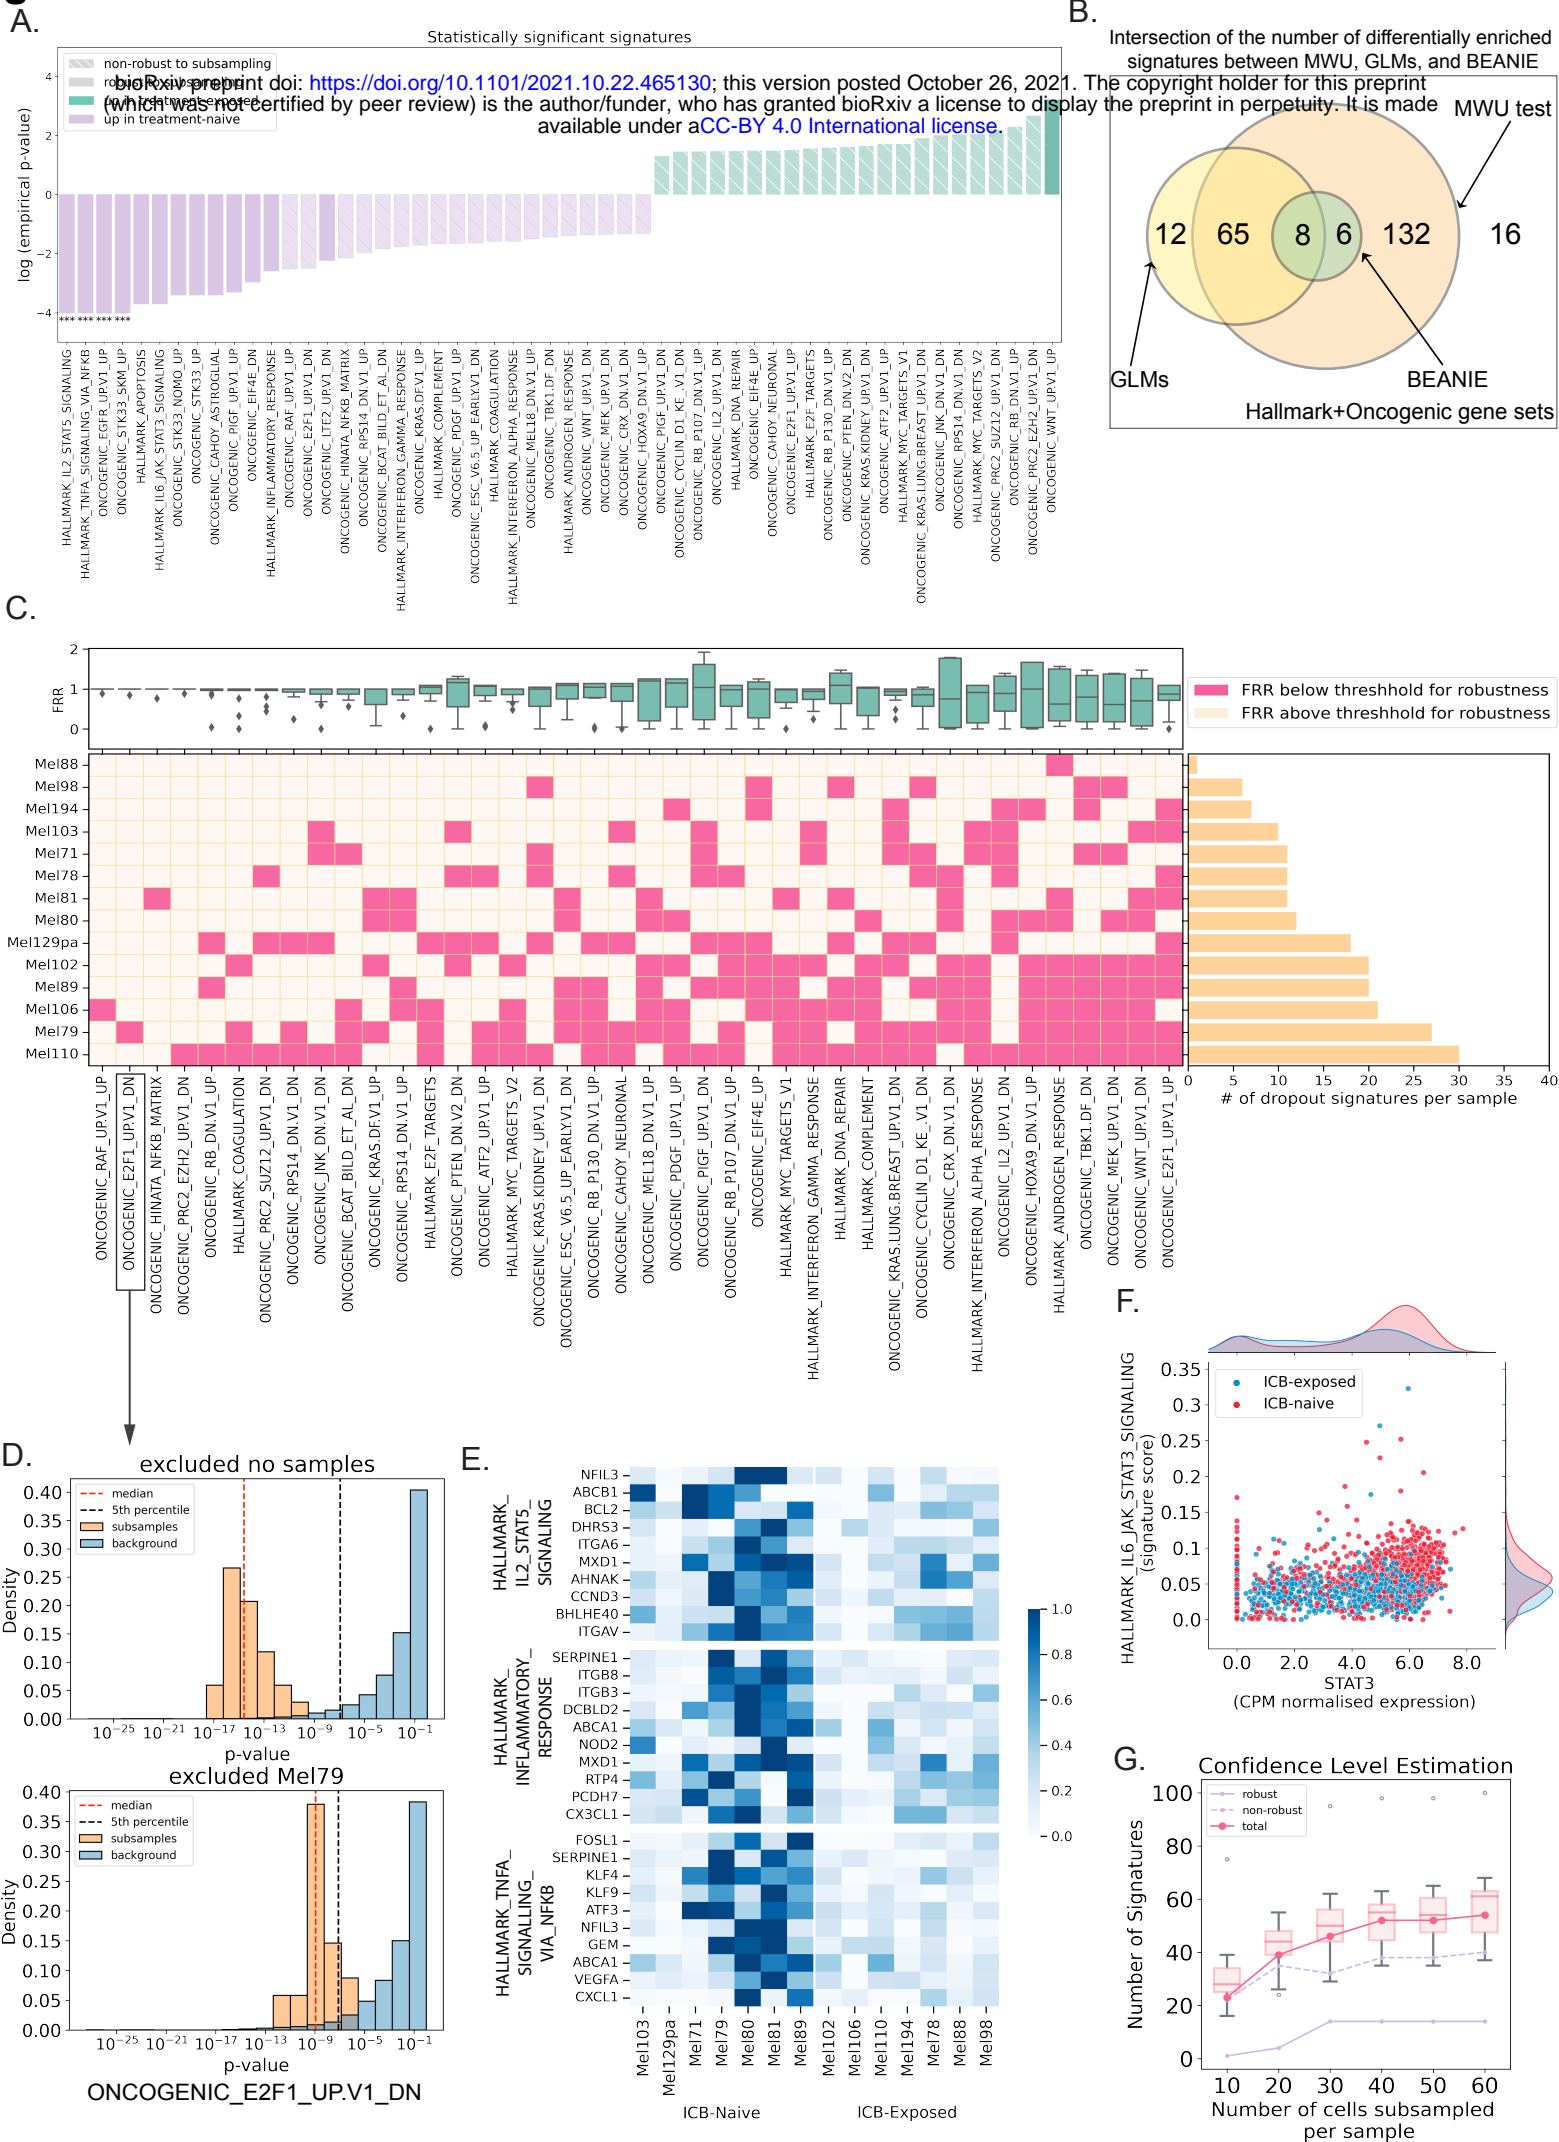





# Figure 4.

A. Intersection of the number of differentially enriched signatures between MWU, GLMs, and BEANIE

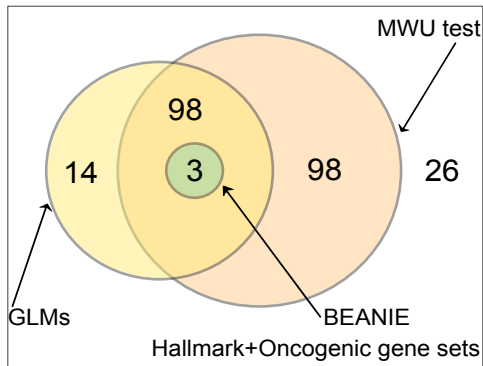

B.

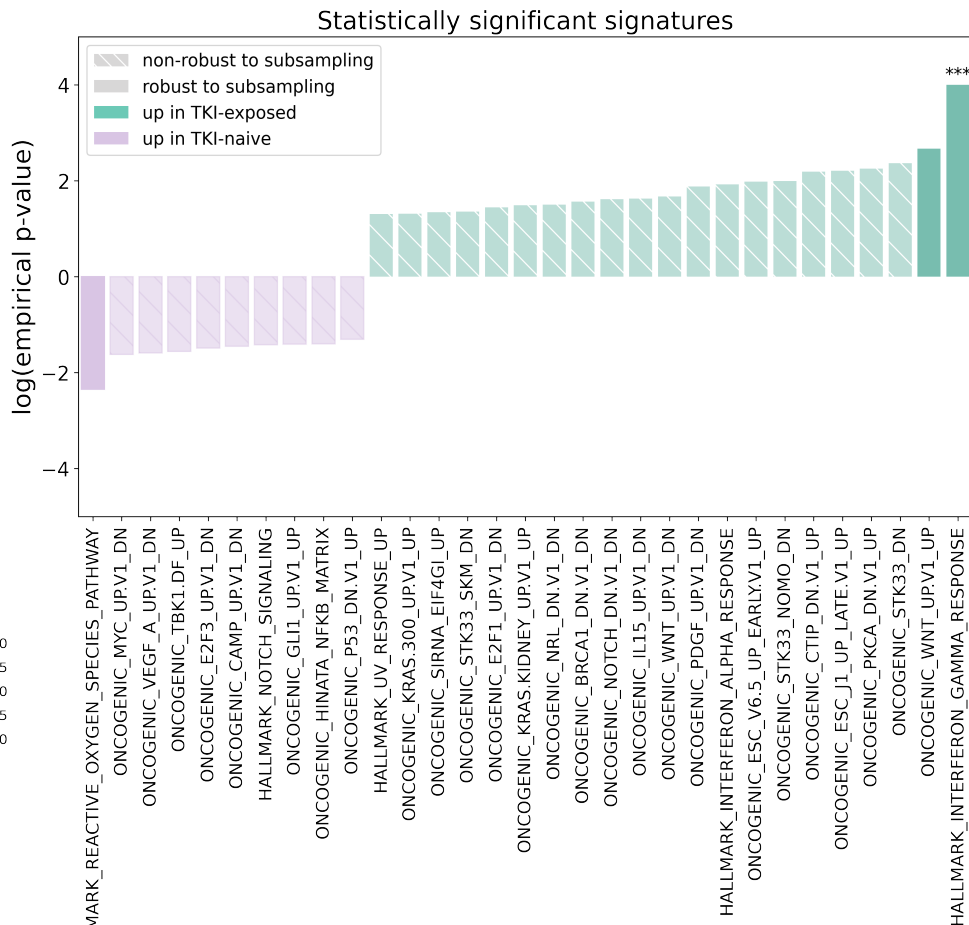

C.

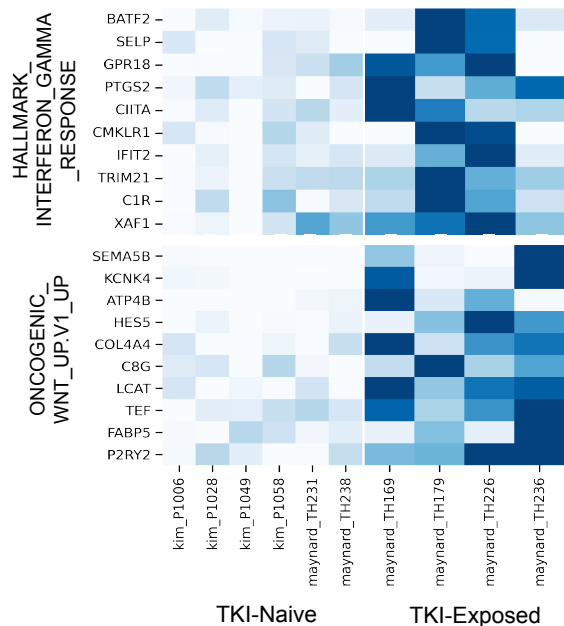

**Figure 5.****A.** ICB-naive vs. ICB-exposed melanoma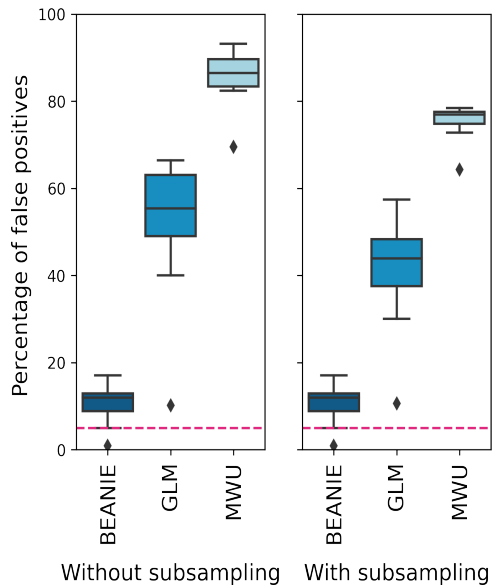**B.** Early-stage vs. Late-stage lung cancer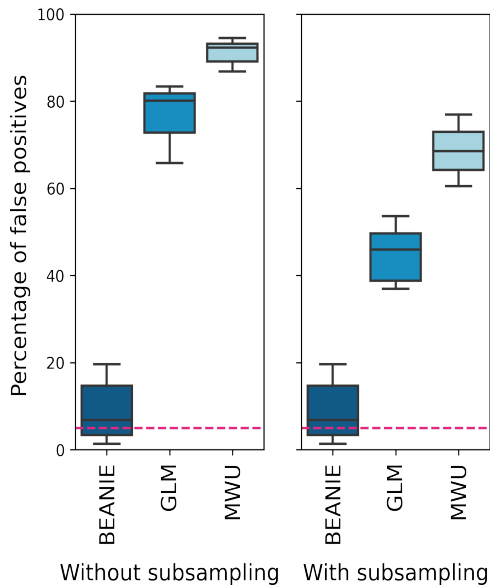**C.** TKI-naive vs. TKI-exposed lung cancer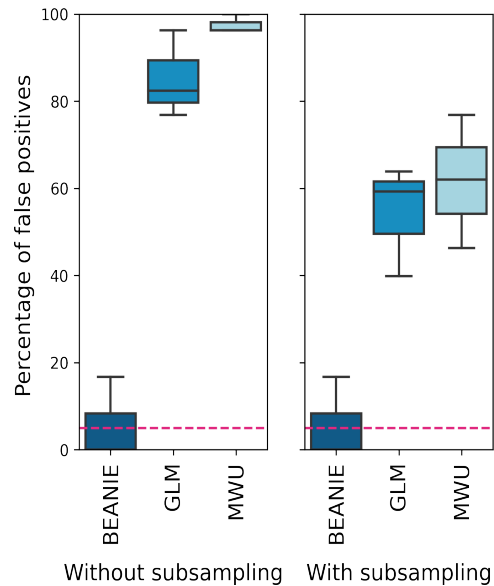

**Figure S1.****A.**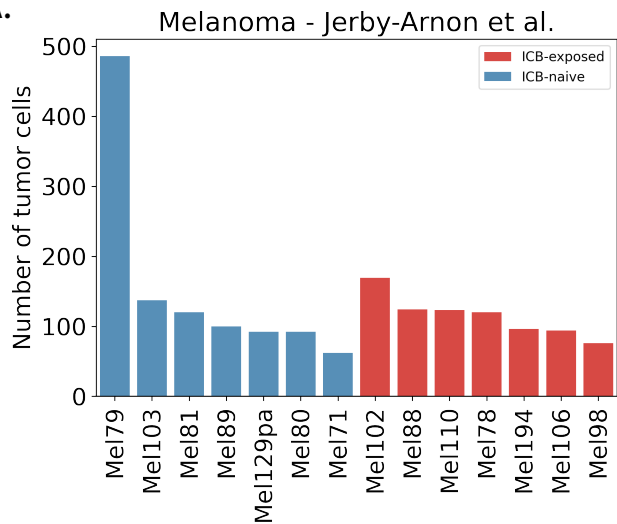**B.**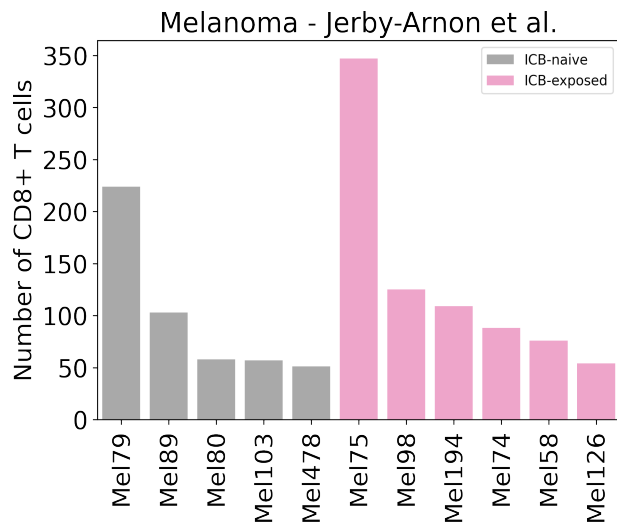

**Figure S2.**

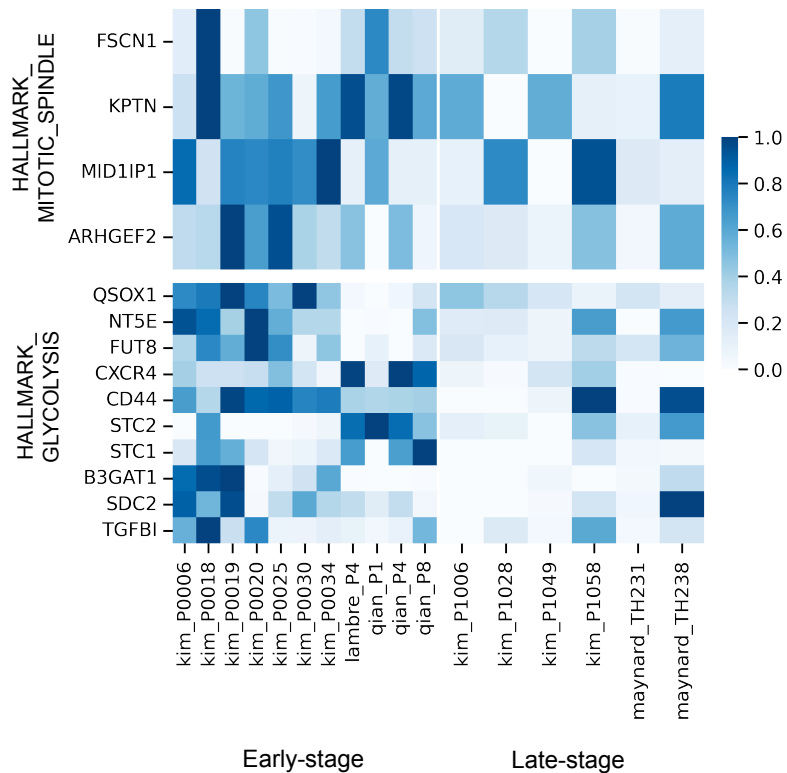



729 **Tables**

|                                                                          |                     | <b>MWU test</b> | <b>GLM</b> | <b>BEANIE</b> |
|--------------------------------------------------------------------------|---------------------|-----------------|------------|---------------|
| <b>Melanoma (Immune Checkpoint Blockade (ICB)-naive vs. ICB-exposed)</b> | Hallmark gene sets  | 45/50           | 27/50      | 5/50          |
|                                                                          | Oncogenic gene sets | 166/189         | 58/189     | 9/189         |
| <b>Lung (Early-stage vs. Late-stage)</b>                                 | Hallmark gene sets  | 46/50           | 44/50      | 3/50          |
|                                                                          | Oncogenic gene sets | 168/189         | 128/189    | 3/189         |
| <b>Lung (Tyrosine Kinase Inhibitor (TKI) - naive vs. TKI-exposed)</b>    | Hallmark gene sets  | 47/50           | 33/50      | 2/50          |
|                                                                          | Oncogenic gene sets | 152/189         | 82/189     | 1/189         |

730 ***Table 1. Number of differentially enriched signatures identified with the three methods***

731 ***(MWU test, GLMs, and BEANIE) using Hallmark (n = 50) and Oncogenic (n = 189) gene sets.***

732

733

|                                   | MWU test + BH correction |                  | GLMs                |                  | BEANIE |
|-----------------------------------|--------------------------|------------------|---------------------|------------------|--------|
|                                   | Without subsampling      | With subsampling | Without subsampling | With subsampling |        |
| <b>ICB-naive vs. ICB-exposed</b>  | 85.74%                   | 75.57%           | 52.58%              | 41.72%           | 10.63% |
| <b>Early-stage vs. Late-stage</b> | 91.23%                   | 68.6%            | 77.03%              | 44.93%           | 9.01%  |
| <b>TKI-naive vs. TKI-exposed</b>  | 97.53%                   | 61.72%           | 85.18%              | 54.32%           | 5.55%  |

734

735 ***Table 2. Average false positive rate for the three datasets (ICB-naive vs. ICB-exposed***  
736 ***melanoma, early-stage vs. late-stage lung cancer, and TKI-naive vs. TKI-exposed lung***  
737 ***cancer) across the three methods (MWU test with a BH correction, GLMs, and BEANIE).***

738
